# Supplementary material
Source: PubMed Central journal article supplement (PMC5915229)
Supplement: 7203205010p1_ds001.pdf [file 7203205010p1_ds001.pdf]

**Supplemental Table 1. Summary of the Evidence Examining the Effectiveness of Curriculum-Based Handwriting Programs**

| Author/Year                                                                                                                                    | Objectives                                                                                                                 | Level of Evidence/Study Design/<br>Participants/Inclusion Criteria                                                                                                                                                                                                                                                                                                                                                                                | Intervention and Control Groups                                                                                                                                                                                                                                                                                                                               | Intervention Length                    | Outcome Measures                                                                                                                 | Results                                                                                                                                                                                                                   |
|------------------------------------------------------------------------------------------------------------------------------------------------|----------------------------------------------------------------------------------------------------------------------------|---------------------------------------------------------------------------------------------------------------------------------------------------------------------------------------------------------------------------------------------------------------------------------------------------------------------------------------------------------------------------------------------------------------------------------------------------|---------------------------------------------------------------------------------------------------------------------------------------------------------------------------------------------------------------------------------------------------------------------------------------------------------------------------------------------------------------|----------------------------------------|----------------------------------------------------------------------------------------------------------------------------------|---------------------------------------------------------------------------------------------------------------------------------------------------------------------------------------------------------------------------|
| Case-Smith, Holland, & Bishop (2011)<br><a href="https://doi.org/10.5014/ajot.2011.000984">https://doi.org/10.5014/ajot.2011.000984</a>        | To develop and pilot test Write Start, an integrated handwriting and writing program for 1 <sup>st</sup> grade students    | Level III<br>Single group pretest-posttest<br><i>N</i> = 19 1 <sup>st</sup> grade students (11 boys, 8 girls; <i>M</i> age = 77.5 mo; age range = 68-86 mo); 2 received special edu; 1 received OT and speech; 1 in RtI program                                                                                                                                                                                                                   | <i>Intervention</i><br>Modeling and copying of letter formation, small group station teaching, embedded individualized support, guiding, monitoring, and providing feedback<br>Co-taught by 2 teachers and OT                                                                                                                                                 | 2 45-min sessions/wk for 12 wks (18hr) | ETCH-M and MHA to assess legibility and speed<br>WJIII Writing Fluency and Writing Samples<br>Test to assess writing performance | Significant improvements in legibility, speed, and fluency<br>Maintained at 6-mo follow-up                                                                                                                                |
| Case-Smith, Holland, Lane, & White (2012)<br><a href="https://doi.org/10.5014/ajot.2012.004333">https://doi.org/10.5014/ajot.2012.004333</a>   | To examine the effects of Write Start for 1 <sup>st</sup> grade students grouped by low, avg, and high baseline legibility | Level III<br>Single group pretest-posttest<br><i>N</i> = 36 1 <sup>st</sup> grade students (21 boys, 18 girls; <i>M</i> age = 77.4 mo; age range = 72-88 mo) with cognitive level >70% on academic testing; 6 students with IEPs<br><i>Inclusion Criteria</i><br>Classrooms with ≥2 students with IEPs and willing teacher                                                                                                                        | <i>Intervention</i><br>Station teaching with high- and low-performing students in each group, multisensory activities for learning letter formation, sentence and story writing, peer modeling and feedback, frequent teacher/OT feedback, and self-evaluation<br>Co-taught by classroom teacher, intervention specialist, and OT                             | 2 45-min sessions/wk for 12 wks (18hr) | ETCH-M to assess legibility and speed<br>WJIII Writing Fluency and Writing Samples<br>Test to assess writing performance         | Significant improvements in legibility, speed, and fluency; low-performing students improved most in legibility<br>Maintained at 6-mo follow-up                                                                           |
| Case-Smith, Holland, & White (2014)<br><a href="https://doi.org/10.3109/01942638.2013.783898">https://doi.org/10.3109/01942638.2013.783898</a> | To compare Write Start with a standard handwriting program                                                                 | Level II<br>Nonrandomized comparison group<br><i>N</i> = 67 1 <sup>st</sup> grade students; 7 students with IEPs<br>Intervention group, <i>n</i> = 37 (19 boys 18 girls; <i>M</i> age = 77.3 mo; age range = 72-88 mo)<br>Control group, <i>n</i> = 30 (14 boys, 16 girls; <i>M</i> age = 79.0 mo; age range = 65-92 mo)<br><i>Inclusion Criteria</i><br>Children without visual impairment or cognitive disabilities. English as first language. | <i>Intervention</i><br>Write Start curriculum; station teaching, modeling and copying of letter formation, frequent teacher/OT feedback and monitoring, peer modeling and feedback<br>Co-taught by 2 teachers and OT<br><i>Control</i><br>Standard instruction; classroom teachers provided 20 min of handwriting and 20 min of writing instruction 4 days/wk | 2 45-min sessions/wk for 12 wks (18hr) | ETCH-M to assess legibility and speed<br>WJIII Writing Fluency and Writing Samples<br>Test to assess writing performance         | Significant improvements in lowercase alphabet legibility and writing fluency in Write Start group compared to control group<br>No significant difference in speed, avg legibility, and written expression between groups |

(Continued)

**Supplemental Table 1. Summary of the Evidence Examining the Effectiveness of Curriculum-Based Handwriting Programs (cont.)**

| Author/Year                                                                                                                                     | Objectives                                                                                                                                          | Level of Evidence/Study Design/<br>Participants/Inclusion Criteria                                                                                                                                                                                                                                                                                                                                   | Intervention and Control Groups                                                                                                                                                                                                                                                                                                                                                                                                                                              | Intervention Length                                           | Outcome Measures                                                                                                                                     | Results                                                                                                                                                                                                                                                                                                              |
|-------------------------------------------------------------------------------------------------------------------------------------------------|-----------------------------------------------------------------------------------------------------------------------------------------------------|------------------------------------------------------------------------------------------------------------------------------------------------------------------------------------------------------------------------------------------------------------------------------------------------------------------------------------------------------------------------------------------------------|------------------------------------------------------------------------------------------------------------------------------------------------------------------------------------------------------------------------------------------------------------------------------------------------------------------------------------------------------------------------------------------------------------------------------------------------------------------------------|---------------------------------------------------------------|------------------------------------------------------------------------------------------------------------------------------------------------------|----------------------------------------------------------------------------------------------------------------------------------------------------------------------------------------------------------------------------------------------------------------------------------------------------------------------|
| Case-Smith, Weaver, & Holland (2014)<br><a href="https://doi.org/10.5014/ajot.2014.011585">https://doi.org/10.5014/ajot.2014.011585</a>         | To examine the effects of Write Start for 1 <sup>st</sup> grade students and determine if the program benefits students with diverse learning needs | Level II<br>Nonrandomized comparison group<br><i>N</i> = 135 1 <sup>st</sup> grade students<br>Intervention group, <i>n</i> = 77<br>Control group, <i>n</i> = 55<br><br><i>Inclusion Criteria</i><br>Students in 1 <sup>st</sup> grade regular education classrooms. English as first language.                                                                                                      | <i>Intervention</i><br>Write Start curriculum; station teaching, modeling and copying of letter formation, frequent teacher/OT feedback, peer modeling and feedback<br>Co-taught by 2 teachers and OT<br><br><i>Control</i><br>Standard instruction following district's writing curriculum; 15-20 min sessions 3-4 days per wk                                                                                                                                              | 2 45-min sessions/wk for 12 wks (18hr)                        | ETCH-M to assess lowercase legibility and speed<br>WJIII Writing Fluency and Writing Samples tests to assess writing fluency and writing composition | Significant improvements in legibility and speed in Write Start group compared to control group<br><br>No improvement in writing fluency at posttest, but fluency significantly higher in Write Start group at 6-mo follow-up<br><br>Write Start students with low baseline legibility made significant improvements |
| Donica (2015)<br><a href="https://doi.org/10.5014/ajot.2015.018366">https://doi.org/10.5014/ajot.2015.018366</a>                                | To determine the effectiveness of the HWT kindergarten printing curriculum                                                                          | Level II<br>Two-group non-randomized controlled trial<br><br><i>N</i> = 59 half-day kgrtn students in private school<br>Intervention group, <i>n</i> = 40 (23 boys, 17 girls; <i>M age</i> = 76.05 mo)<br>Control group, <i>n</i> = 19 (16 boys, 3 girls; <i>M age</i> = 77.68 mo)                                                                                                                   | <i>Intervention</i><br>Kgrtn HWT lessons; gross motor activity with handwriting-related song, learning activity (forming letters with multisensory manipulatives or workbook writing)<br>Taught by classroom teachers; OT/OT students present for one lesson per wk<br><br><i>Control</i><br>Teacher-developed instruction using D'Nealian style of writing                                                                                                                  | 15 min/day over 2 yr (~90hr)                                  | THS-R manuscript assessment to assess legibility                                                                                                     | Significant improvements in legibility in HWT group compared to control group                                                                                                                                                                                                                                        |
| Donica, Goins, & Wagner (2013)<br><a href="https://dx.doi.org/10.1080/19411243.2013.810938">https://dx.doi.org/10.1080/19411243.2013.810938</a> | To determine the effects of two different handwriting readiness programs                                                                            | Level II<br>Three group non-randomized controlled trial<br><br><i>N</i> = 48 Head Start students<br>Intervention group A, <i>n</i> = 16 (4 boys, 12 girls; <i>M age</i> = 57.2 mo)<br>Intervention group B, <i>n</i> = 18 (11 boys, 7 girls; <i>M age</i> = 50.7 mo)<br>Control group, <i>n</i> = 14 (8 boys, 6 girls; <i>M age</i> = 48.7 mo)<br><br><i>Inclusion Criterion</i><br>Teacher interest | <i>Intervention</i><br>Implemented during classroom center time by 2 graduate assistants<br><i>Group A</i><br>The Fine Motor and Early Writing Pre-K curriculum; station teaching with adapted writing tools, workbooks, and sensory activities<br><i>Group B</i><br>HWT-GSS curriculum; music and movement, station teaching with multi-sensory tools to learn body awareness and fine-motor skills<br><br><i>Control</i><br>No additional handwriting instruction provided | 10-15 min (during 1hr center time) 2X/wk for 16 wks (~6.67hr) | SHS to assess pre-writing skills and letter/number formation                                                                                         | No significant changes in legibility in the intervention groups compared to the control group                                                                                                                                                                                                                        |

(Continued)

**Supplemental Table 1. Summary of the Evidence Examining the Effectiveness of Curriculum-Based Handwriting Programs (cont.)**

| Author/Year                                                                                                                                       | Objectives                                                                                                                                                 | Level of Evidence/Study Design/<br>Participants/Inclusion Criteria                                                                                                                                                                                                                                                                                                                                                           | Intervention and Control Groups                                                                                                                                                                                                                                                                                                                                  | Intervention Length                                 | Outcome Measures                                                                                                             | Results                                                                                                                        |
|---------------------------------------------------------------------------------------------------------------------------------------------------|------------------------------------------------------------------------------------------------------------------------------------------------------------|------------------------------------------------------------------------------------------------------------------------------------------------------------------------------------------------------------------------------------------------------------------------------------------------------------------------------------------------------------------------------------------------------------------------------|------------------------------------------------------------------------------------------------------------------------------------------------------------------------------------------------------------------------------------------------------------------------------------------------------------------------------------------------------------------|-----------------------------------------------------|------------------------------------------------------------------------------------------------------------------------------|--------------------------------------------------------------------------------------------------------------------------------|
| Howe, Roston, Sheu, & Hinojosa (2013)<br><a href="https://doi.org/10.5014/ajot.2013.005470">https://doi.org/10.5014/ajot.2013.005470</a>          | To examine the effectiveness of an intensive handwriting practice (IP) compared to visual-perceptual-motor (VPM) activities provided in a Handwriting Club | Level II<br>Two group non-randomized controlled trial<br><i>N</i> = 72 1 <sup>st</sup> and 2 <sup>nd</sup> grade students<br>Intervention group A, <i>n</i> = 38 ( <i>M</i> age = 6.57yr; age range = 5.81-7.93yr)<br>Intervention group B, <i>n</i> = 34 ( <i>M</i> age = 6.69yr; age range = 5.93-7.67yr)<br><i>Inclusion Criteria</i><br>No students with extremely high scores on the MHA pre-intervention               | <i>Intervention</i><br>Handwriting Clubs led by OTs<br><i>Group A</i><br>IP; motor learning techniques, grade-level handwriting curriculum and writing tasks, focus on letter formation and composition, HWT book, handwriting games<br><i>Group B</i><br>VPM; activities from letters/number/shapes book, HWT book, handwriting games                           | 40-45 min 2X/wk for 6 wks (~8.5hr)                  | MHA to assess speed and legibility                                                                                           | Significant improvements in legibility but not speed in IP group compared to VPM group                                         |
| Kaiser, Albaret, & Doudin (2011)<br><a href="https://doi.org/10.2466/11.25.PMS.112.2.610-618">https://doi.org/10.2466/11.25.PMS.112.2.610-618</a> | To investigate the effects of an explicit handwriting program for 1st grade students                                                                       | Level II<br>Two-group nonrandomized controlled trial<br><i>N</i> = 42 1 <sup>st</sup> grade students<br>Intervention group, <i>n</i> = 23 (8 boys, 15 girls; age range = 6.1-7.3yr)<br>Control group, <i>n</i> = 19 (8 boys, 11 girls)<br><i>Inclusion Criteria</i><br>Enrollment in a school in rural Switzerland.                                                                                                          | <i>Intervention</i><br>Explicit handwriting program; digital dexterity exercises, discussion about usefulness of handwriting, teaching of letters in cursive only, practice, metacognitive task<br>Administered by author and 2 OT students<br><i>Control</i><br>40 min/wk, practiced 2-3 letters by copying individual letters and words containing the letters | 45 min 2X/wk for 6 wks (9hr)                        | French version of the BHK-Concise Assessment Scale for Children's Handwriting to assess handwriting speed and quality        | Significant improvements in post-test legibility and speed in explicit handwriting group compared to control group             |
| Lust & Donica (2011)<br><a href="https://doi.org/10.5014/ajot.2011.000612">https://doi.org/10.5014/ajot.2011.000612</a>                           | To measure handwriting readiness and fine motor skills of preschool students in HWT-GSS program                                                            | Level II<br>Two-group nonrandomized controlled trial<br><i>N</i> = 32 preschool students<br>Intervention group, <i>n</i> = 17 (8 boys, 9 girls; <i>M</i> age = 55.4mo)<br>Control group, <i>n</i> = 15 (10 boys, 5 girls; <i>M</i> age = 55.9mo)<br><i>Inclusion Criteria</i><br>Classrooms selected by Head Start director and children had no identified cognitive or physical deficit that would affect fine motor skills | <i>Intervention</i><br>HWT-GSS in addition to Head Start curriculums; small group activities for body awareness, directional concepts, letter-play, coloring, tracing capital letters and shapes<br>Led by Head Start teacher and OT/OT students with training in HWT-GSS curriculum<br><i>Control</i><br>Head Start curriculum                                  | 3 20-min sessions/wk for 5 mo (47 total) (~15.67hr) | LAP-3 Pre-Writing domain to measure child skill development<br>Check Readiness tool to measure kindergarten readiness skills | Significant improvements in kindergarten readiness and children's skill development in HWT-GSS group compared to control group |

(Continued)

**Supplemental Table 1. Summary of the Evidence Examining the Effectiveness of Curriculum-Based Handwriting Programs (cont.)**

| Author/Year                                                                                                                                                | Objectives                                                                                                                                  | Level of Evidence/Study Design/Participants/Inclusion Criteria                                                                                                                                                                                                                                                                                                                                                 | Intervention and Control Groups                                                                                                                                                                                                                                                                                                                                                                                   | Intervention Length                                             | Outcome Measures                                                                                                                                                           | Results                                                                                                                                                                                                |
|------------------------------------------------------------------------------------------------------------------------------------------------------------|---------------------------------------------------------------------------------------------------------------------------------------------|----------------------------------------------------------------------------------------------------------------------------------------------------------------------------------------------------------------------------------------------------------------------------------------------------------------------------------------------------------------------------------------------------------------|-------------------------------------------------------------------------------------------------------------------------------------------------------------------------------------------------------------------------------------------------------------------------------------------------------------------------------------------------------------------------------------------------------------------|-----------------------------------------------------------------|----------------------------------------------------------------------------------------------------------------------------------------------------------------------------|--------------------------------------------------------------------------------------------------------------------------------------------------------------------------------------------------------|
| Pfeiffer, Rai, Murray, Brusilovskiy (2015)<br><a href="https://doi.org/10.1177/1539449215573004">https://doi.org/10.1177/1539449215573004</a>              | To study changes in handwriting legibility among kgrtn-2 <sup>nd</sup> grade students receiving the Size Matters Handwriting Program (SMHP) | Level II<br>Two-group pre-post-test (one school had randomized classrooms, while the other did not)<br><br>N = 207 students (age range = 5-8yr); 55 kgrtn (23 boys, 32 girls), 74 1st grade (31 boys, 43 girls), 78 2nd grade (33 boys, 45 girls); 9 students with an IEP; 18 students with a diagnosis; 19 students receiving OT services                                                                     | <i>Intervention</i><br>SMHP; focus on letter size (instruction varied based on grade level); direct instruction, memorable mnemonics, motivational incentives, visual cueing, self-critique and monitoring<br>Taught by classroom teacher; OTs onsite to provide support<br><br><i>Control</i><br>Standard instruction implemented by classroom teacher; varied between classes and schools                       | 40 20-min sessions (~13.33hr)                                   | THS-R to assess manuscript legibility (specific subtests varied based on grade level)<br><br>MHA to assess speed, rate, legibility, form, alignment, size, and spacing     | Significant improvements in legibility in the SMHP group compared to control group<br><br>Speed decreased more in SMHP group compared to control group                                                 |
| Roberts, Derkach-Ferguson, Siever, & Rose (2014)<br><a href="https://doi.org/10.1177/0008417414527065">https://doi.org/10.1177/0008417414527065</a>        | To examine the effectiveness of HWT program on the handwriting skills of 1 <sup>st</sup> grade students                                     | Level II<br>Quasi-experimental cross-over design<br><br>N = 149 1 <sup>st</sup> grade students (M age = 6.2)<br><br>Group A, n = 77 (40 boys, 37 girls)<br>Group B, n = 72 (43 boys, 29 girls)<br><br><i>Inclusion Criteria</i><br>School had to have ≥2 1 <sup>st</sup> grade non-special education classes in English. Teachers and administrators had to agree to participate and commit to the HWT program | Group A and Group B switched after one 9-wk block so each received intervention and control<br><br><i>Intervention</i><br>HWT instruction using HWT kindergarten workbook and multisensory materials<br><br>Teacher led; OT supported teacher but did not implement intervention<br><br><i>Teacher-designed instruction group</i><br>Methods chosen by the teacher, could not include HWT techniques or materials | 5 20-min sessions/wk for 9 wks; 9-wk blocks/yr for 2 yrs (15hr) | MHA to assess legibility and speed                                                                                                                                         | Significant improvements in form, spacing, alignment, and size in HWT group compared to control group<br><br>No significant improvements in legibility or speed in HWT group compared to control group |
| Salls, Benson, Hansen, Cole, & Pielielek (2013)<br><a href="https://doi.org/10.1080/19411243.2013.810958">https://doi.org/10.1080/19411243.2013.810958</a> | To compare the results of 2 handwriting curricula on handwriting performance in 1st grade students                                          | Level II/III<br>Two-group repeated measures design, but no control group<br><br>N = 31 1 <sup>st</sup> grade students (age range = 6 yr 0 mo-7yr 1 mo)<br>Intervention Group A, n = 14 (6 boys, 8 girls; M age = 6.5yr)<br>Intervention Group B, n = 17 (11 boys, 6 girls; M age = 6.6yr)<br><br><i>Inclusion Criteria</i><br>Students could not be receiving special education or OT services                 | <i>Intervention</i><br>Implemented by teachers with specific training in curriculums<br><i>Group A</i><br>HWT; sensorimotor activities for learning letter formation<br><i>Group B</i><br>Peterson Directed Handwriting Method; focus on movement sequence and rhythm                                                                                                                                             | School year (hr unknown)                                        | The Print Tool to assess memory, orientation, placement, size, start, sequence, control, and spacing<br><br>MHA to evaluate legibility, form, alignment, size, and spacing | Within group improvements in speed but not legibility<br><br>No significant differences in improvements between groups                                                                                 |

(Continued)

**Supplemental Table 1. Summary of the Evidence Examining the Effectiveness of Curriculum-Based Handwriting Programs (cont.)**

| Author/Year                                                                                                                                         | Objectives                                                                                  | Level of Evidence/Study Design/<br>Participants/Inclusion Criteria                                                                               | Intervention and Control Groups                                                                                                                                                                                                           | Intervention Length              | Outcome Measures                                                                                                              | Results                                                                                                                                        |
|-----------------------------------------------------------------------------------------------------------------------------------------------------|---------------------------------------------------------------------------------------------|--------------------------------------------------------------------------------------------------------------------------------------------------|-------------------------------------------------------------------------------------------------------------------------------------------------------------------------------------------------------------------------------------------|----------------------------------|-------------------------------------------------------------------------------------------------------------------------------|------------------------------------------------------------------------------------------------------------------------------------------------|
| Taras, Brennan, Gilbert, & Eck Reed (2011)<br><a href="https://doi.org/10.1080/19411243.2011.62955">https://doi.org/10.1080/19411243.2011.62955</a> | To evaluate the effectiveness of the Write Direction handwriting program for kgrtn students | Level II<br>Pre-test post-test matched comparison group<br>$N = 382$ kgrtn students<br>Intervention group, $n = 211$<br>Control group, $n = 171$ | <i>Intervention</i><br>Write Direction curriculum; warm-up and directionality exercises, target letters of the day, and letter formation practice<br><i>Control</i><br>Teachers taught handwriting using their preferred teaching methods | 30-min sessions for 14 wks (7hr) | Routine district-level functional measurement tool to assess legibility, formation, directionality, and proportion of letters | No significant improvements in legibility for Write Direction group compared to control group<br><br>Significant improvements in letter skills |

*Note.* avg = average; edu = education; ETCH-M = Evaluation Tool of Children's Handwriting-Manuscript; HWT = Handwriting Without Tears; HWT-GSS = Handwriting Without Tears Get Set for School; IEP = Individualized Education Program; IP = Intensive practice; kgrtn = kindergarten; LAP-3 = Language Accomplishment Profile; MHA = Minnesota Handwriting Assessment; min = minute/s; mo = month(s); OT = occupational therapist/occupational therapy; RTI = response-to-intervention; SHS = The Shore Handwriting Screening for Early Handwriting Development; SMHP = Size Matters Handwriting Program; THS = Test of Handwriting Skills; THS-R = Test of Handwriting Skills-Revised; VPM = visual-perceptual-motor; WJIII = Woodcock-Johnson III Tests of Achievement; wk/wks = week(s); yr/s = year/s.

**Supplemental Table 2. Risk-of-Bias Table**

| Citation                                                                                                                                             | Selection Bias             |                        | Performance Bias                       |                                                        | Detection Bias                                     |                         | Attrition Bias      |   | Reporting Bias |
|------------------------------------------------------------------------------------------------------------------------------------------------------|----------------------------|------------------------|----------------------------------------|--------------------------------------------------------|----------------------------------------------------|-------------------------|---------------------|---|----------------|
|                                                                                                                                                      | Random Sequence Generation | Allocation Concealment | Blinding of Participants and Personnel | Blinding of Outcome Assessment: Self-Reported Outcomes | Blinding of Outcome Assessment: Objective Outcomes | Incomplete Outcome Data | Selective Reporting |   |                |
| Case-Smith, Holland, & Bishop (2011)<br><a href="https://doi.org/10.5014/ajot.2011.000984">https://doi.org/10.5014/ajot.2011.000984</a>              | NA                         | NA                     | NA                                     | NA                                                     | +                                                  | +                       | +                   | + |                |
| Case-Smith, Holland, Lane, & White (2012)<br><a href="https://doi.org/10.5014/ajot.2012.004333">https://doi.org/10.5014/ajot.2012.004333</a>         | NA                         | NA                     | ?                                      | NA                                                     | +                                                  | +                       | +                   | + |                |
| Case-Smith, Holland, & White (2012)<br><a href="https://doi.org/10.3109/01942638.2013.783898">https://doi.org/10.3109/01942638.2013.783898</a>       | NA                         | NA                     | ?                                      | NA                                                     | +/-                                                | +                       | +                   | + |                |
| Case-Smith, Weaver, & Holland (2014)<br><a href="https://doi.org/10.5014/ajot.2014.011585">https://doi.org/10.5014/ajot.2014.011585</a>              | NA                         | -                      | ?                                      | NA                                                     | +                                                  | +                       | +                   | + |                |
| Donica (2015)<br><a href="https://doi.org/10.5014/ajot.2015.018366">https://doi.org/10.5014/ajot.2015.018366</a>                                     | NA                         | -                      | -                                      | NA                                                     | -                                                  | ?                       | ?                   | + |                |
| Donica, Goins, & Wagner (2013)<br><a href="https://dx.doi.org/10.1080/19411243.2013.810938">https://dx.doi.org/10.1080/19411243.2013.810938</a>      | NA                         | -                      | -                                      | NA                                                     | -                                                  | +                       | +                   | + |                |
| Howe, Roston, Sheu, & Hinojosa (2013)<br><a href="https://doi.org/10.5014/ajot.2013.005470">https://doi.org/10.5014/ajot.2013.005470</a>             | NA                         | +                      | ?                                      | NA                                                     | +/-                                                | ?                       | ?                   | + |                |
| Kaiser, Albaret, & Doudin (2011)<br><a href="https://doi.org/10.2466/11.25.PMS.112.2.610-618">https://doi.org/10.2466/11.25.PMS.112.2.610-618</a>    | NA                         | ?                      | ?                                      | NA                                                     | ?                                                  | ?                       | ?                   | ? |                |
| Lust & Donica (2011)<br><a href="https://doi.org/10.5014/ajot.2011.000612">https://doi.org/10.5014/ajot.2011.000612</a>                              | NA                         | -                      | -                                      | NA                                                     | -                                                  | +/-                     | +                   | + |                |
| Pfeiffer, Rai, Murray, & Brusilovskiy (2015)<br><a href="https://doi.org/10.1177/1539449215573004">https://doi.org/10.1177/1539449215573004</a>      | NA                         | ?                      | ?                                      | NA                                                     | ?                                                  | +                       | +                   | + |                |
| Roberts, Derkach, Ferguson, Siever, & Rose (2014)<br><a href="https://doi.org/10.1177/0008417414527065">https://doi.org/10.1177/0008417414527065</a> | NA                         | NA                     | NA                                     | NA                                                     | +                                                  | +                       | +                   | + |                |

(Continued)

**Supplemental Table 2. Risk-of-Bias Table (cont.)**

| Citation                                                                                                                                                    | Selection Bias                   |                           | Performance Bias<br>Blinding of Participants<br>and Personnel | Detection Bias                                            |                                                       | Attrition Bias<br>Incomplete<br>Outcome Data | Reporting Bias<br>Selective<br>Reporting |
|-------------------------------------------------------------------------------------------------------------------------------------------------------------|----------------------------------|---------------------------|---------------------------------------------------------------|-----------------------------------------------------------|-------------------------------------------------------|----------------------------------------------|------------------------------------------|
|                                                                                                                                                             | Random<br>Sequence<br>Generation | Allocation<br>Concealment |                                                               | Blinding of Outcome Assessment:<br>Self-Reported Outcomes | Blinding of Outcome Assessment:<br>Objective Outcomes |                                              |                                          |
| Salls, Benson, Hansen, Cole, & Piellelele (2013)<br><a href="https://doi.org/10.1080/19411243.2013.810958">https://doi.org/10.1080/19411243.2013.810958</a> | NA                               | -                         | ?                                                             | NA                                                        | +                                                     | ?                                            | +                                        |
| Taras, Brennan, Gilbert, & Eck Reed (2011)<br><a href="https://doi.org/10.1080/19411243.2011.62955">https://doi.org/10.1080/19411243.2011.62955</a>         | NA                               | -                         | ?                                                             | NA                                                        | ?                                                     | ?                                            | +                                        |

Note. Categories for risk of bias: + = low risk of bias; +/- = moderate risk of bias; - = high risk of bias; ? = insufficient information. NA = not applicable. Risk-of-bias table format adapted from "Assessing Risk of Bias in Included Studies," by J. P. T. Higgins, D. G. Altman, and J. A. C. Sterne, in *Cochrane Handbook for Systematic Reviews of Interventions* (Version 5.1.0), by J. P. T. Higgins and S. Green (Eds.), March 2011. Retrieved from <http://www.cochrane-handbook.org>. Copyright © 2011 by The Cochrane Collaboration.
